# Supplementary material for: Ocean acidification does not limit squid metabolism via blood oxygen supply
Source: Oxford University Press journal article supplement (doi:10.1242/jeb.187443), 2018-01-01
Supplement: jeb187443supp.pdf [file jeb187443supp.pdf]

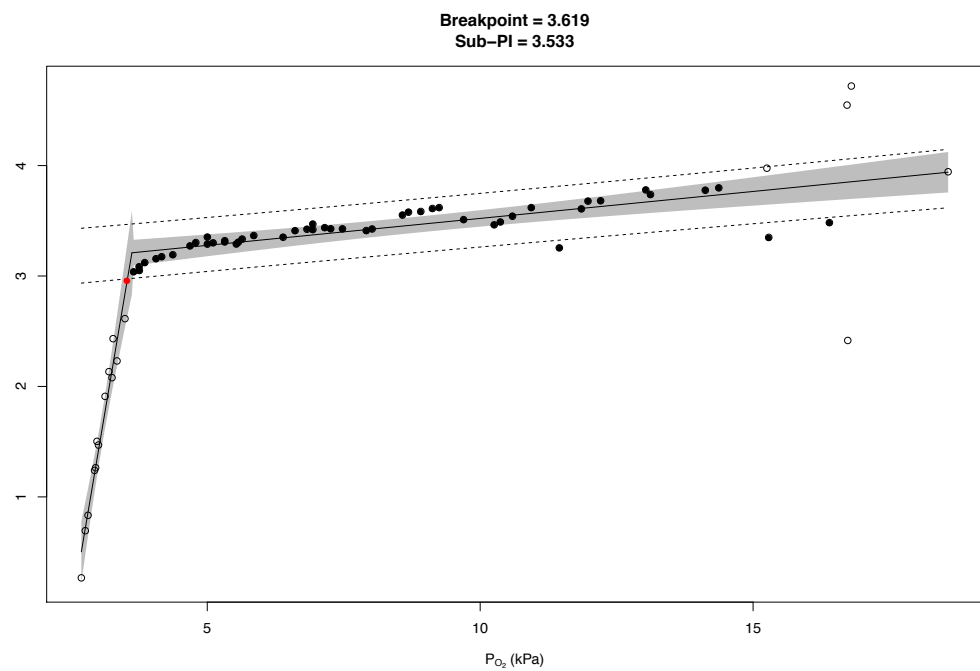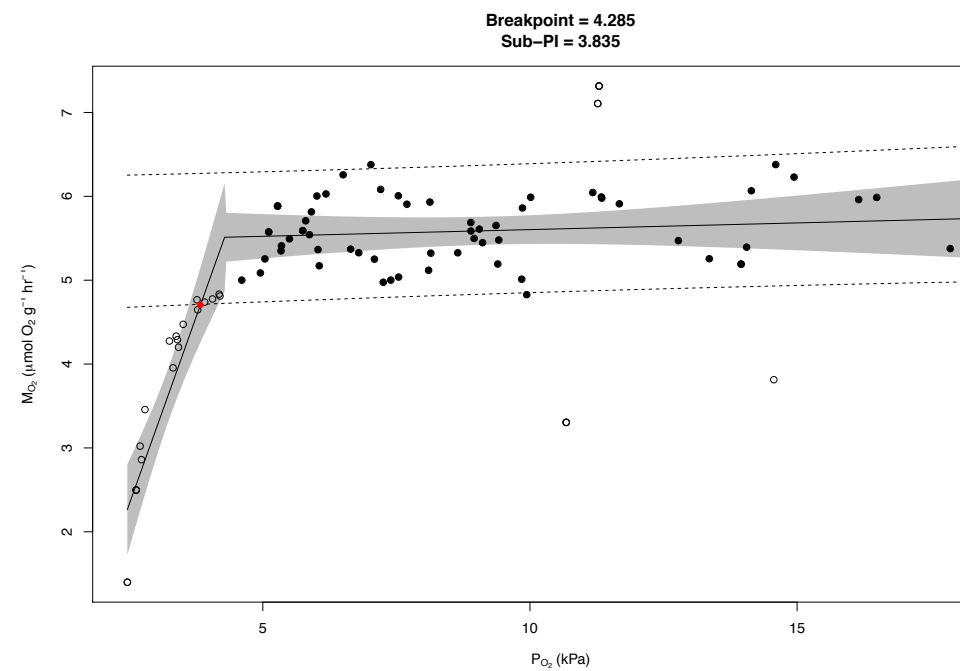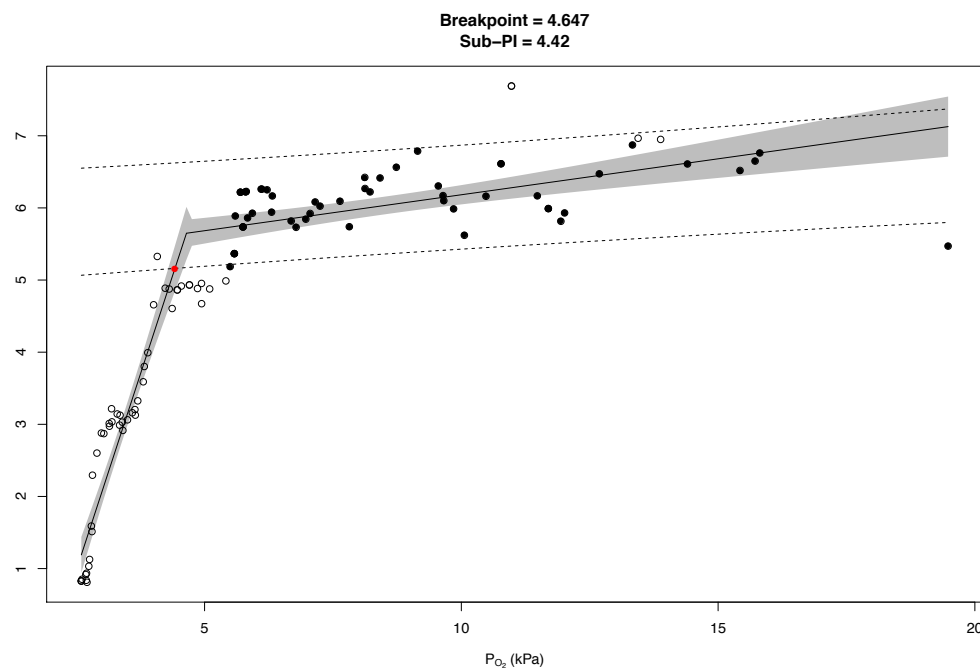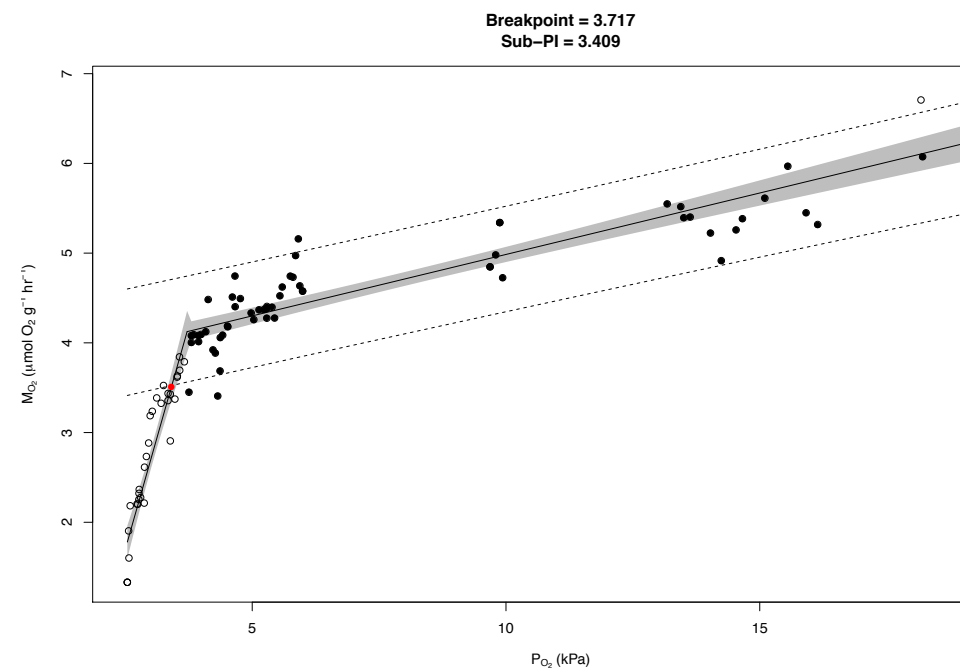

**Figure S1. Representative  $MO_2$ - $PO_2$  relationships and  $P_{crit}$  calculations for *Doryteuthis pealeii* at 15°C.** Breakpoint  $P_{crit}$  was calculated via the “segmented” R package. Sub-prediction interval (Sub-PI)  $P_{crit}$  was calculated by constructing a 95% prediction interval (dashed lines) around the oxyregulating data (black points). The sub-PI  $P_{crit}$  was defined as the intersection (red point) between the oxyconforming line and the lower bound of the prediction interval. Shaded bands are the 95% confidence intervals for the breakpoint lines. Values at the top of each panel are  $P_{crit}$  values (kPa).

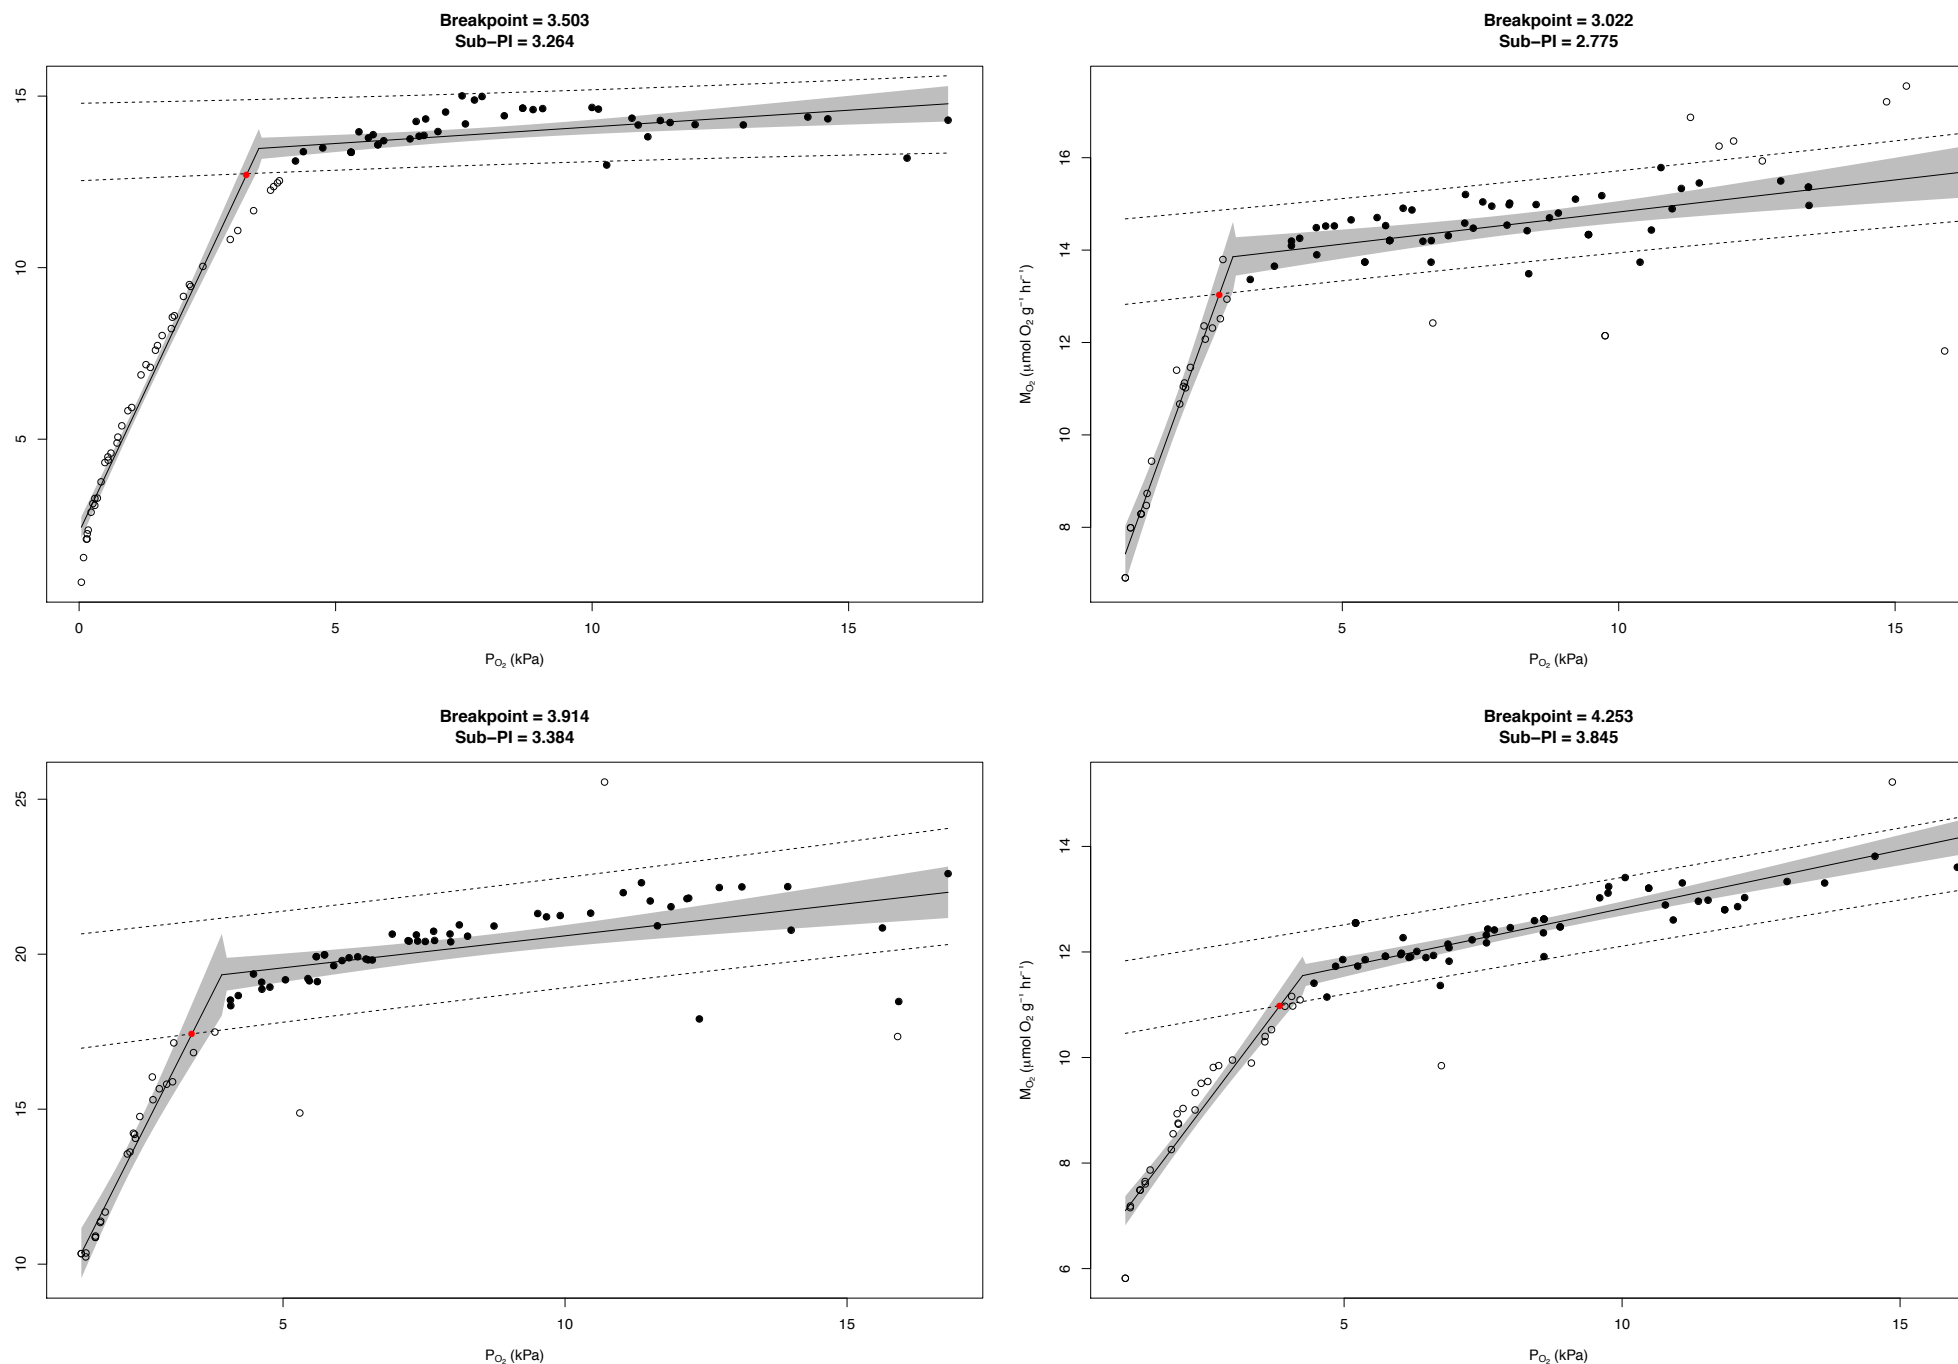

**Figure S2. Representative  $MO_2$ - $PO_2$  relationships and  $P_{crit}$  calculations for *Dosidicus gigas* at 23-27°C.** Breakpoint  $P_{crit}$  was calculated via the “segmented” R package. Sub-prediction interval (Sub-PI)  $P_{crit}$  was calculated by constructing a 95% prediction interval (dashed lines) around the oxyregulating data (black points). The sub-PI  $P_{crit}$  was defined as the intersection (red point) between the oxyconforming line and the lower bound of the prediction interval. Shaded bands are the 95% confidence intervals for the breakpoint lines. Values at the top of each panel are  $P_{crit}$  values (kPa).
